# Supplementary material
Source: MDPI journal article supplement (https://www.mdpi.com/2227-9040/12/2/22)
Supplement: s1 [file s1]

# Online Measurement of Sodium Nitrite Based on Near-Infrared Spectroscopy

Xianzhe Xu <sup>†</sup>, Yongshen Zhang <sup>†</sup>, Mingmin Zhang, Dingming Li and Chen Zuo <sup>\*</sup>

Institute of Radiochemistry, China Institute of Atomic Energy, Beijing 102413, China;

xianzhxu\_21@163.com (X.X.); m15110185336@163.com (Y.Z.);

15689736095@163.com (M.Z.);

dingminglee@cnnmail.cn (D.L.)

<sup>\*</sup> Correspondence: zchen\_2008@126.com

<sup>†</sup> These authors contributed equally to this work.

**Table S1 Predictions and assessment results of the sodium nitrite model**

| Number | Reference value<br>(mol/L) | Predicted value<br>(mol/L) | Absolute error<br>(mol/L) | Relative error<br>(%) |
|--------|----------------------------|----------------------------|---------------------------|-----------------------|
| 1      | 0.529                      | 0.572                      | 0.044                     | 8.23                  |
| 2      |                            | 0.561                      | 0.033                     | 6.15                  |
| 3      |                            | 0.559                      | 0.031                     | 5.77                  |
| 4      |                            | 1.194                      | 0.198                     | 19.86                 |
| 5      | 0.996                      | 1.193                      | 0.197                     | 19.76                 |
| 6      |                            | 1.196                      | 0.200                     | 20.06                 |
| 7      |                            | 1.300                      | 0.041                     | 3.22                  |
| 8      |                            | 1.293                      | 0.033                     | 2.66                  |
| 9      | 1.260                      | 1.282                      | 0.023                     | 1.79                  |
| 10     |                            | 3.296                      | 0.041                     | 1.25                  |
| 11     |                            | 3.308                      | 0.053                     | 1.62                  |
| 12     |                            | 3.304                      | 0.049                     | 1.50                  |
| 13     | 0.949                      | 0.956                      | 0.007                     | 0.79                  |
| 14     |                            | 0.949                      | 0.000                     | 0.05                  |
| 15     |                            | 0.947                      | -0.002                    | -0.16                 |
| 16     |                            | 1.688                      | 0.023                     | 1.41                  |
| 17     | 1.665                      | 1.687                      | 0.022                     | 1.35                  |
| 18     |                            | 1.688                      | 0.023                     | 1.41                  |
| 19     |                            | 1.957                      | 0.047                     | 2.44                  |
| 20     |                            | 1.949                      | 0.039                     | 2.03                  |
| 21     | 1.910                      | 1.948                      | 0.038                     | 1.97                  |
| 22     |                            | 2.268                      | 0.064                     | 2.93                  |
| 23     |                            | 2.261                      | 0.058                     | 2.61                  |
| 24     |                            | 2.266                      | 0.063                     | 2.84                  |
| 25     | 2.204                      | 2.992                      | -0.008                    | -0.27                 |
| 26     |                            | 2.994                      | -0.006                    | -0.20                 |
| 27     |                            | 3.000                      | 0.000                     | 0.00                  |
| 28     |                            | 3.995                      | -0.005                    | -0.12                 |

|    |       |        |       |
|----|-------|--------|-------|
| 29 | 4.002 | 0.002  | 0.05  |
| 30 | 3.997 | -0.003 | -0.08 |

**Table S2 Results of different spectral preprocessing methods selected for the calibrated model**

| Number | Preprocessing method                                        | Wave number<br>(cm <sup>-1</sup> ) | R <sup>2</sup> | RMSECV |
|--------|-------------------------------------------------------------|------------------------------------|----------------|--------|
| 1      | No spectral pretreatment                                    | 5400-7500                          | 0.9985         | 0.0679 |
| 2      | <b>eliminating constant offset</b>                          | 5400-7500                          | 0.9989         | 0.0532 |
| 3      | <b>subtracting a straight line</b>                          | 5400-7500                          | 0.9988         | 0.0577 |
| 4      | <b>vector normalization</b>                                 | 5400-7500                          | 0.9999         | 0.0192 |
| 5      | <b>max-min normalization</b>                                | 5400-7500                          | 0.9997         | 0.0317 |
| 6      | <b>multiple scattering correction(MSC)</b>                  | 5400-7500                          | 0.9999         | 0.0185 |
| 7      | First-order derivative                                      | 5400-7500                          | 0.9991         | 0.0495 |
| 8      | Second-order derivative                                     | 5400-7500                          | 0.9963         | 0.106  |
| 9      | First-order derivative + <b>subtracting a straight line</b> | 5400-7500                          | 0.9991         | 0.0493 |
| 10     | First-order derivative+ <b>vector normalization</b>         | 5400-7500                          | 0.9997         | 0.0311 |
| 11     | First-order derivative +MSC                                 | 5400-7500                          | 0.9998         | 0.0255 |

**Table S3 Results of the calibrated model selecting different spectral bands**

| Number | Wave number (cm <sup>-1</sup> ) | RMSECV |
|--------|---------------------------------|--------|
| 1      | 5450-9400                       | 0.0224 |
| 2      | 4250-4600, 6100-7500            | 0.0269 |
| 3      | 4250-4600, 5400-9400            | 0.0326 |
| 4      | 4250-4600, 5450-7500            | 0.0288 |
| 5      | 4250-4600, 6100-9400            | 0.0344 |
| 6      | 5450-7426                       | 0.0182 |
| 7      | 5450-7500                       | 0.0186 |
| 8      | 6100-7500                       | 0.0404 |
| 9      | 4250-4600, 5450-6100, 7500-9400 | 0.0341 |
| 10     | 5450-6100                       | 0.0197 |
| 11     | 5450-6100, 7500-9400            | 0.0863 |
| 12     | 7424-9400                       | 0.0224 |

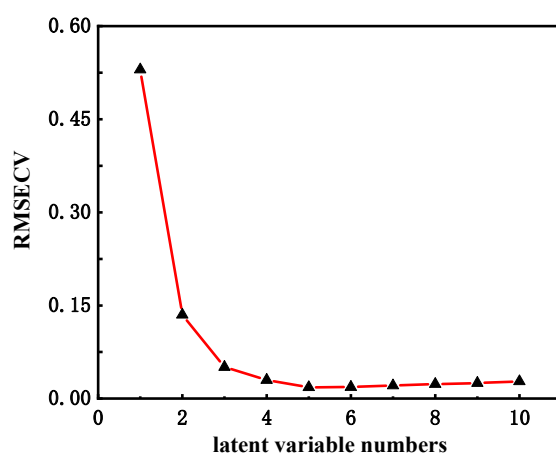

**Figure S1 Results of the calibrated model selecting different number of factors**

**Table S4 Predictions and assessment results of the modified model**

| Number | Reference value<br>(mol/L) | Predicted value<br>(mol/L) | Absolute error<br>(mol/L) | Relative error<br>(%) |
|--------|----------------------------|----------------------------|---------------------------|-----------------------|
| 1      | 0.529                      | 0.532                      | 0.004                     | 0.66                  |
| 2      |                            | 0.518                      | -0.011                    | -1.99                 |
| 3      |                            | 0.518                      | -0.011                    | -1.99                 |
| 4      |                            | 1.071                      | 0.075                     | 7.51                  |
| 5      |                            | 1.064                      | 0.068                     | 6.81                  |
| 6      | 0.996                      | 1.071                      | 0.075                     | 7.51                  |
| 7      |                            | 1.260                      | 0.000                     | 0.04                  |
| 8      |                            | 1.253                      | -0.007                    | -0.52                 |
| 9      |                            | 1.237                      | -0.023                    | -1.79                 |
| 10     |                            | 3.248                      | -0.007                    | -0.22                 |
| 11     | 3.255                      | 3.263                      | 0.008                     | 0.24                  |
| 12     |                            | 3.255                      | 0.000                     | -0.01                 |
| 13     |                            | 0.924                      | -0.025                    | -2.58                 |
| 14     |                            | 0.915                      | -0.034                    | -3.53                 |
| 15     |                            | 0.916                      | -0.033                    | -3.43                 |
| 16     | 1.665                      | 1.656                      | -0.009                    | -0.52                 |
| 17     |                            | 1.662                      | -0.003                    | -0.16                 |
| 18     |                            | 1.659                      | -0.006                    | -0.34                 |
| 19     |                            | 1.928                      | 0.018                     | 0.93                  |
| 20     |                            | 1.914                      | 0.004                     | 0.19                  |
| 21     | 1.910                      | 1.918                      | 0.008                     | 0.40                  |
| 22     |                            | 2.232                      | 0.029                     | 1.29                  |
| 23     |                            | 2.228                      | 0.025                     | 1.11                  |
| 24     |                            | 2.235                      | 0.031                     | 1.43                  |
| 25     |                            | 2.966                      | -0.034                    | -1.13                 |
| 26     | 3.000                      | 2.954                      | -0.046                    | -1.53                 |

|    |       |       |        |       |
|----|-------|-------|--------|-------|
| 27 |       | 2.941 | -0.059 | -1.97 |
| 28 |       | 3.957 | -0.043 | -1.08 |
| 29 | 4.000 | 3.961 | -0.039 | -0.98 |
| 30 |       | 3.956 | -0.044 | -1.10 |

**Table S5 Reference values for samples used for calibration and prediction**

| Reference values of calibration samples<br>(mol/L) | Reference values of prediction samples<br>(mol/L) |
|----------------------------------------------------|---------------------------------------------------|
| 0.300                                              | 0.529                                             |
| 0.496                                              | 0.996                                             |
| 0.707                                              | 1.260                                             |
| 0.797                                              | 3.255                                             |
| 0.902                                              | 0.949                                             |
| 0.398                                              | 1.665                                             |
| 0.993                                              | 1.910                                             |
| 1.098                                              | 2.204                                             |
| 1.203                                              | 3.000                                             |
| 1.294                                              | 4.000                                             |
| 1.399                                              |                                                   |
| 1.504                                              |                                                   |
| 1.805                                              |                                                   |
| 2.106                                              |                                                   |
| 2.407                                              |                                                   |
| 2.707                                              |                                                   |
| 3.008                                              |                                                   |
| 3.204                                              |                                                   |
| 3.505                                              |                                                   |
| 3.805                                              |                                                   |
| 4.000                                              |                                                   |
| 4.211                                              |                                                   |
| 4.512                                              |                                                   |
| 4.798                                              |                                                   |
| 4.994                                              |                                                   |
| 5.204                                              |                                                   |
| 5.505                                              |                                                   |
| 5.806                                              |                                                   |
| 6.016                                              |                                                   |
| 0.404                                              |                                                   |
| 1.603                                              |                                                   |
| 3.001                                              |                                                   |
| 4.397                                              |                                                   |
